# Supplementary material for: Increased Krüppel-like factor 12 in recurrent implantation failure impairs endometrial decidualization by repressing Nur77 expression
Source: PubMed Central journal article supplement (PMC5374626; doi:10.1186/s12958-017-0243-8), 2017-03-31
Supplement: 12958_2017_243_MOESM2_ESM.pdf [file 12958_2017_243_MOESM2_ESM.pdf]

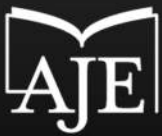

# EDITORIAL CERTIFICATE

This document certifies that the manuscript listed below was edited for proper English language, grammar, punctuation, spelling, and overall style by one or more of the highly qualified native English speaking editors at American Journal Experts.

## Manuscript title:

Increased Krüppel-like factor 12 in recurrent implantation failure impairs endometrial decidualization through repressing Nur77 expression

## Authors:

Chenyang Huang, Yue Jiang, Jianjun Zhou, Qiang Yan, Ruiwei Jiang, Xi Cheng, Jun Xing, Lijun Ding, Jianxin Sun, Guijun Yan, Haixiang Sun

## Date Issued:

November 4, 2016

## Certificate Verification Key:

0BB1-7EAB-CD37-90A7-DF6C

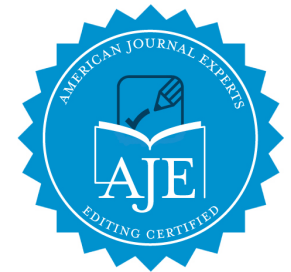

This certificate may be verified at [www.aje.com/certificate](http://www.aje.com/certificate). This document certifies that the manuscript listed above was edited for proper English language, grammar, punctuation, spelling, and overall style by one or more of the highly qualified native English speaking editors at American Journal Experts. Neither the research content nor the authors' intentions were altered in any way during the editing process. Documents receiving this certification should be English-ready for publication; however, the author has the ability to accept or reject our suggestions and changes. To verify the final AJE edited version, please visit our verification page. If you have any questions or concerns about this edited document, please contact American Journal Experts at [support@aje.com](mailto:support@aje.com).
